# Supplementary material for: Enabling high-performance and high-rate-capability Na4MnV(PO4)3 sodium-ion battery cathodes through tuning the NASICON framework
Source: Royal Society of Chemistry journal article supplement (doi:10.1039/d4ta06069e), 2024-12-17
Supplement: d4ta06069e1.pdf [file d4ta06069e1.pdf]

## Supporting Information

Enabling high-performance and high-rate-capability  $\text{Na}_4\text{MnV}(\text{PO}_4)_3$  sodium-ion battery cathodes through tuning the NASICON framework

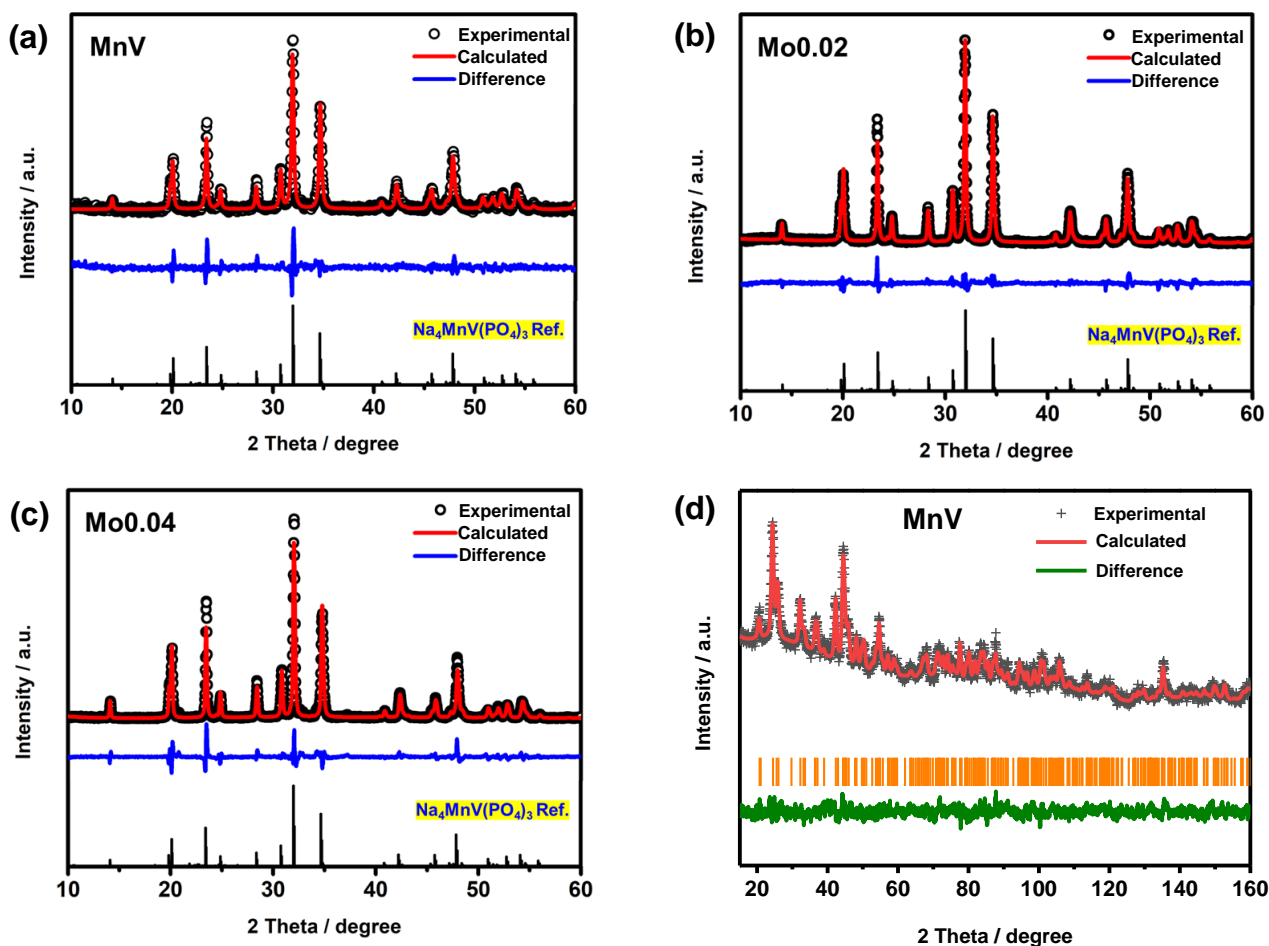

**Figure S1.** Rietveld refinement profiles using XRD data of the NASICON-type structure Mo-doped  $\text{Na}_4\text{MnV}(\text{PO}_4)_3$  (precursor molar ratio of Mo to NMVP = 0, 0.02, 0.03, 0.04, denoted as MnV, Mo0.02, Mo0.03, and Mo0.04, respectively) cathode material for compositions (a) MnV, (b) Mo0.02, and (c) Mo0.04. (d) The refined fit profile against neutron powder diffraction pattern of MnV powder (Rwp = 3.43%, GOF: 1.42)

**Table S1.** Refined structure of Na<sub>4</sub>MnV(PO<sub>4</sub>)<sub>3</sub> using XRD

|                                                                                                          |              |                                                                                                                                               |          |          |
|----------------------------------------------------------------------------------------------------------|--------------|-----------------------------------------------------------------------------------------------------------------------------------------------|----------|----------|
| <b>Space group = <math>R\bar{3}c</math></b>                                                              |              | <b><math>a = b = 8.965(7) \text{ \AA}</math>, <math>c = 21.574(2) \text{ \AA}</math>,<br/>Volume = <math>1501.885(5) \text{ \AA}^3</math></b> |          |          |
| <b><math>R_{wp} = 4.75\%</math>, <math>R_{exp} = 8.24\%</math>, <math>R_p = 6.13\%</math>, GOF: 1.73</b> |              |                                                                                                                                               |          |          |
| <b>Atom</b>                                                                                              | <b>Mult.</b> | <b>x</b>                                                                                                                                      | <b>y</b> | <b>z</b> |
| Na1                                                                                                      | 6            | 0.00000                                                                                                                                       | 0.00000  | 0.00000  |
| Na2                                                                                                      | 18           | 0.64250                                                                                                                                       | 0.00000  | 0.25000  |
| O1                                                                                                       | 36           | 0.01360                                                                                                                                       | 0.20900  | 0.19320  |
| O2                                                                                                       | 36           | 0.18360                                                                                                                                       | 0.17210  | 0.08520  |
| Mn                                                                                                       | 12           | 0.00000                                                                                                                                       | 0.00000  | 0.14901  |
| V                                                                                                        | 12           | 0.00000                                                                                                                                       | 0.00000  | 0.14901  |
| P                                                                                                        | 18           | 0.29800                                                                                                                                       | 0.00000  | 0.25000  |

Footnotes:  $R_{wp}$ : R-weighted pattern;  $R_{exp}$ : R-expected;  $R_p$ : R-pattern; GOF: goodness-of-fit

**Table S2.** Refined structure of Mo<sub>0.02</sub> using XRD

|                                                                                                            |              |                                                                                                                                               |          |          |
|------------------------------------------------------------------------------------------------------------|--------------|-----------------------------------------------------------------------------------------------------------------------------------------------|----------|----------|
| <b>Space group = <math>R\bar{3}c</math></b>                                                                |              | <b><math>a = b = 8.968(6) \text{ \AA}</math>, <math>c = 21.540(8) \text{ \AA}</math>,<br/>Volume = <math>1500.521(4) \text{ \AA}^3</math></b> |          |          |
| <b><math>R_{wp} = 7.51\%</math>, <math>R_{exp} = 13.35\%</math>, <math>R_p = 10.20\%</math>, GOF: 1.78</b> |              |                                                                                                                                               |          |          |
| <b>Atom</b>                                                                                                | <b>Mult.</b> | <b>x</b>                                                                                                                                      | <b>y</b> | <b>z</b> |
| Na1                                                                                                        | 6            | 0.00000                                                                                                                                       | 0.00000  | 0.00000  |
| Na2                                                                                                        | 18           | 0.64250                                                                                                                                       | 0.00000  | 0.25000  |
| O1                                                                                                         | 36           | 0.01360                                                                                                                                       | 0.20900  | 0.19320  |
| O2                                                                                                         | 36           | 0.18360                                                                                                                                       | 0.17210  | 0.08520  |
| Mn                                                                                                         | 12           | 0.00000                                                                                                                                       | 0.00000  | 0.14901  |
| V                                                                                                          | 12           | 0.00000                                                                                                                                       | 0.00000  | 0.14901  |
| P                                                                                                          | 18           | 0.29800                                                                                                                                       | 0.00000  | 0.25000  |
| Mo                                                                                                         | 12           | 0.29800                                                                                                                                       | 0.00000  | 0.25000  |

**Table S3.** Refined structure of Mo0.03 using XRD

| <b>Space group = <math>R\bar{3}c</math></b>                                                                |              | <b><math>a = b = 8.963(4) \text{ \AA}</math>, <math>c = 21.479(2) \text{ \AA}</math>,<br/>Volume = <math>1494.552(8) \text{ \AA}^3</math></b> |          |          |
|------------------------------------------------------------------------------------------------------------|--------------|-----------------------------------------------------------------------------------------------------------------------------------------------|----------|----------|
| <b><math>R_{wp} = 7.95\%</math>, <math>R_{exp} = 13.54\%</math>, <math>R_p = 10.08\%</math>, GOF: 1.70</b> |              |                                                                                                                                               |          |          |
| <b>Atom</b>                                                                                                | <b>Mult.</b> | <b>x</b>                                                                                                                                      | <b>y</b> | <b>z</b> |
| Na1                                                                                                        | 6            | 0.00000                                                                                                                                       | 0.00000  | 0.00000  |
| Na2                                                                                                        | 18           | 0.64250                                                                                                                                       | 0.00000  | 0.25000  |
| O1                                                                                                         | 36           | 0.01360                                                                                                                                       | 0.20900  | 0.19320  |
| O2                                                                                                         | 36           | 0.18360                                                                                                                                       | 0.17210  | 0.08520  |
| Mn                                                                                                         | 12           | 0.00000                                                                                                                                       | 0.00000  | 0.14901  |
| V                                                                                                          | 12           | 0.00000                                                                                                                                       | 0.00000  | 0.14901  |
| P                                                                                                          | 18           | 0.29800                                                                                                                                       | 0.00000  | 0.25000  |
| Mo                                                                                                         | 12           | 0.29800                                                                                                                                       | 0.00000  | 0.25000  |

**Table S4.** Refined structure of Mo0.04 using XRD

| <b>Space group = <math>R\bar{3}c</math></b>                                                                |              | <b><math>a = b = 8.935(3) \text{ \AA}</math>, <math>c = 21.485(9) \text{ \AA}</math>,<br/>Volume = <math>1484.630(7) \text{ \AA}^3</math></b> |          |          |
|------------------------------------------------------------------------------------------------------------|--------------|-----------------------------------------------------------------------------------------------------------------------------------------------|----------|----------|
| <b><math>R_{wp} = 6.95\%</math>, <math>R_{exp} = 16.36\%</math>, <math>R_p = 12.68\%</math>, GOF: 1.80</b> |              |                                                                                                                                               |          |          |
| <b>Atom</b>                                                                                                | <b>Mult.</b> | <b>x</b>                                                                                                                                      | <b>y</b> | <b>z</b> |
| Na1                                                                                                        | 6            | 0.00000                                                                                                                                       | 0.00000  | 0.00000  |
| Na2                                                                                                        | 18           | 0.64250                                                                                                                                       | 0.00000  | 0.25000  |
| O1                                                                                                         | 36           | 0.01360                                                                                                                                       | 0.20900  | 0.19320  |
| O2                                                                                                         | 36           | 0.18360                                                                                                                                       | 0.17210  | 0.08520  |
| Mn                                                                                                         | 12           | 0.00000                                                                                                                                       | 0.00000  | 0.14901  |
| V                                                                                                          | 12           | 0.00000                                                                                                                                       | 0.00000  | 0.14901  |
| P                                                                                                          | 18           | 0.29800                                                                                                                                       | 0.00000  | 0.25000  |
| Mo                                                                                                         | 12           | 0.29800                                                                                                                                       | 0.00000  | 0.25000  |

**Table S5.** The detailed crystallography of MnV cathode obtained through joint refinement against NPD and XRD data.

| Space group = $R\bar{3}c$     |       | $a = b = 8.953(8) \text{ \AA}$ , $c = 21.484(9) \text{ \AA}$ ,<br>Volume $1491.7(5) \text{ \AA}^3$ |           |           |           |          |
|-------------------------------|-------|----------------------------------------------------------------------------------------------------|-----------|-----------|-----------|----------|
| $R_{wp} = 3.43\%$ , GOF: 1.42 |       |                                                                                                    |           |           |           |          |
| Atom                          | Mult. | x                                                                                                  | y         | z         | Occupancy | UIISO    |
| Na1                           | 6     | 0.00000                                                                                            | 0.00000   | 0.00000   | 1         | 0.044(5) |
| Na2                           | 18    | 0.6427(1)                                                                                          | 0.00000   | 0.25000   | 1         | 0.063(4) |
| O1                            | 36    | 0.0108(7)                                                                                          | 0.2056(7) | 0.1921(8) | 1         | 0.035(8) |
| O2                            | 36    | 0.1875(5)                                                                                          | 0.1724(5) | 0.0856(5) | 1         | 0.019(4) |
| Mn                            | 12    | 0.00000                                                                                            | 0.00000   | 0.1489(3) | 0.5       | 0.029(1) |
| V                             | 12    | 0.00000                                                                                            | 0.00000   | 0.1489(3) | 0.5       | 0.029(1) |
| P                             | 18    | 0.2987(5)                                                                                          | 0.00000   | 0.25000   | 1         | 0.011(7) |

**Table S6.** The detailed crystallography of Mo<sub>0.03</sub> cathode obtained through joint refinement against NPD and XRD data.

| Space group = $R\bar{3}c$     |       | $a = b = 8.953(4) \text{ \AA}$ , $c = 21.456(8) \text{ \AA}$ ,<br>Volume = $1489.6(1) \text{ \AA}^3$ |           |           |           |          |
|-------------------------------|-------|------------------------------------------------------------------------------------------------------|-----------|-----------|-----------|----------|
| $R_{wp} = 4.32\%$ , GOF: 1.65 |       |                                                                                                      |           |           |           |          |
| Atom                          | Mult. | x                                                                                                    | y         | z         | Occupancy | UIISO    |
| Na1                           | 6     | 0.00000                                                                                              | 0.00000   | 0.00000   | 1         | 0.038(3) |
| Na2                           | 18    | 0.6396(7)                                                                                            | 0.00000   | 0.25000   | 1         | 0.050(2) |
| O1                            | 36    | 0.0131(4)                                                                                            | 0.2083(4) | 0.1921(1) | 1         | 0.035(1) |
| O2                            | 36    | 0.1864(3)                                                                                            | 0.1716(3) | 0.0848(1) | 1         | 0.022(1) |
| Mn                            | 12    | 0.00000                                                                                              | 0.00000   | 0.1492(1) | 0.5       | 0.016(2) |
| V                             | 12    | 0.00000                                                                                              | 0.00000   | 0.1492(1) | 0.5       | 0.016(2) |
| P                             | 18    | 0.2988(3)                                                                                            | 0.00000   | 0.25000   | 0.97      | 0.014(1) |
| Mo                            | 18    | 0.2988(3)                                                                                            | 0.00000   | 0.25000   | 0.03      | 0.014(1) |

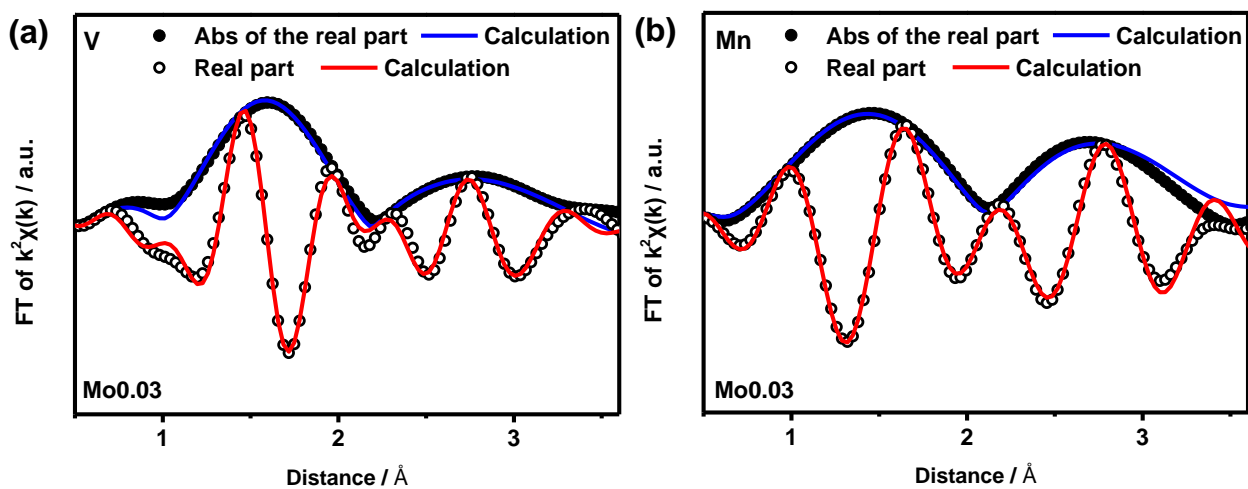

**Figure S2.** EXAFS spectrum of Mo0.03 at the (a) V and (b) Mn *K*-edge with model fits

**Table S7.** EXAFS model analysis results

| Element | Shell | Coordination Number | $r / \text{\AA}$ | $\sigma^2 \times 10^{-3} / \text{\AA}^2$ | $\Delta E / \text{eV}$ | R         |
|---------|-------|---------------------|------------------|------------------------------------------|------------------------|-----------|
| Mn      | Mn–O  | 6                   | 2.15(7)          | 0.0031(8)                                | 3.311                  | 0.0069(9) |
|         | Mn–P  | 4                   | 3.57(9)          | 0.0053(1)                                |                        |           |
| V       | V–O   | 6                   | 2.06(2)          | 0.0027(6)                                | 5.635                  | 0.0158(1) |
|         | V–P   | 4                   | 3.61(1)          | 0.0072(6)                                |                        |           |

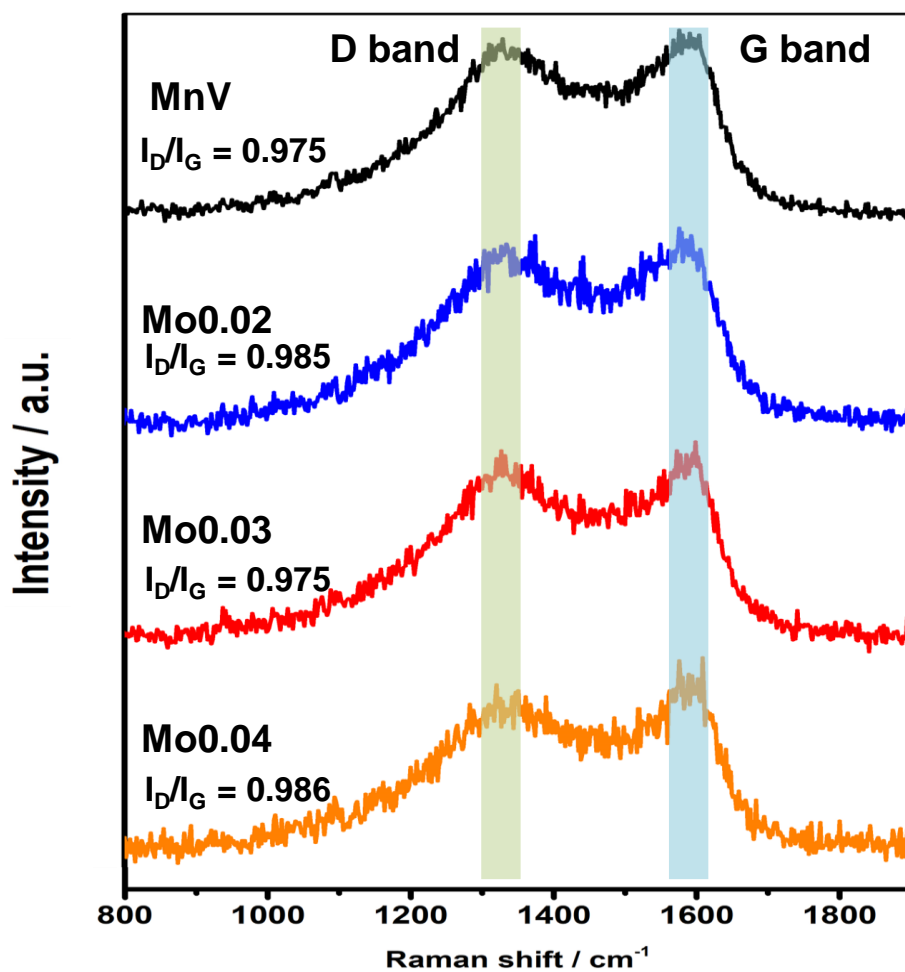

**Figure S3.** Raman spectrum of MnV, Mo0.02, Mo0.03, and Mo0.04 cathodes. Data are offset in y for clarity. D and G bands are shaded in green and blue, respectively.

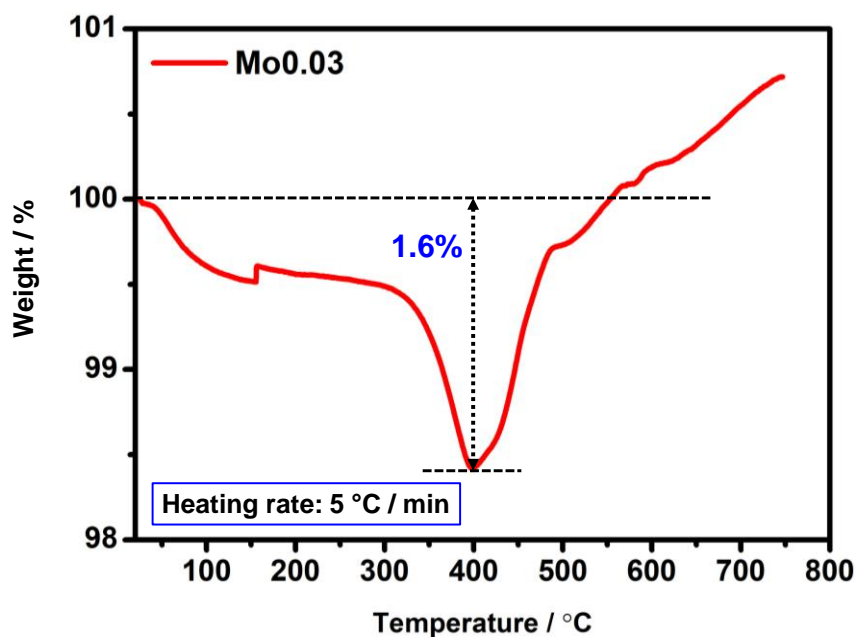

**Figure S4.** Thermogravimetry analysis (TGA) data for Mo0.03

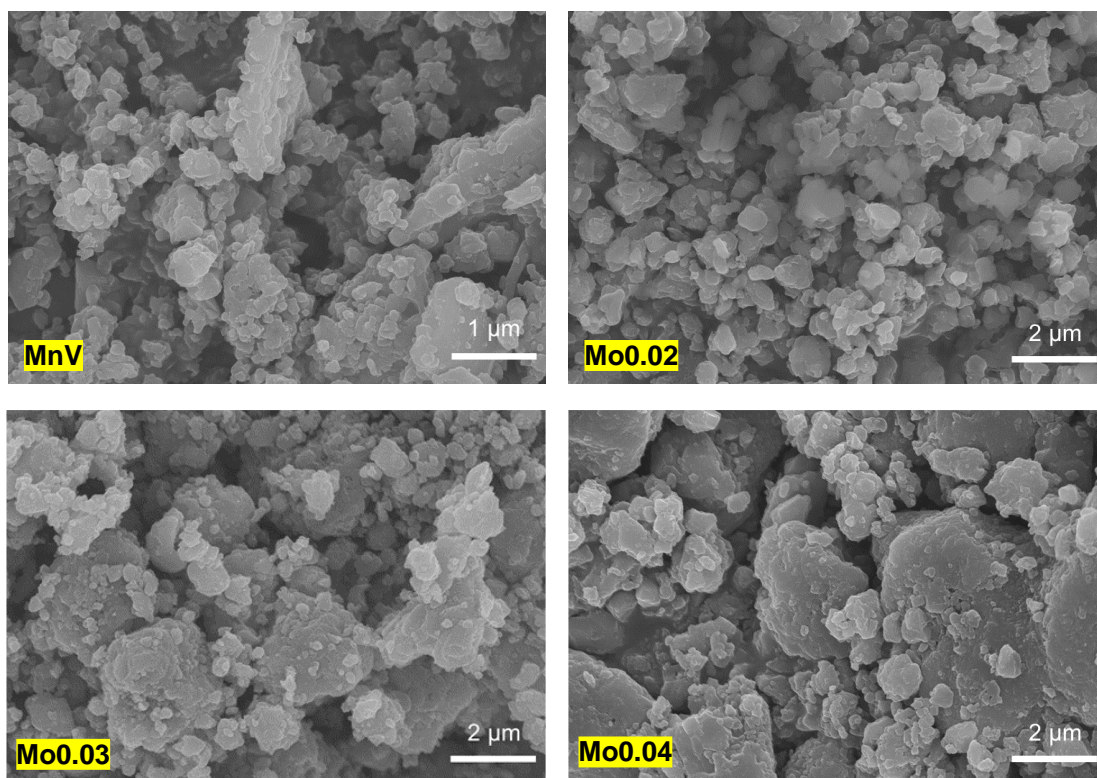

**Figure S5.** Typical SEM images of MnV, Mo0.02, Mo0.03, and Mo0.04 cathodes

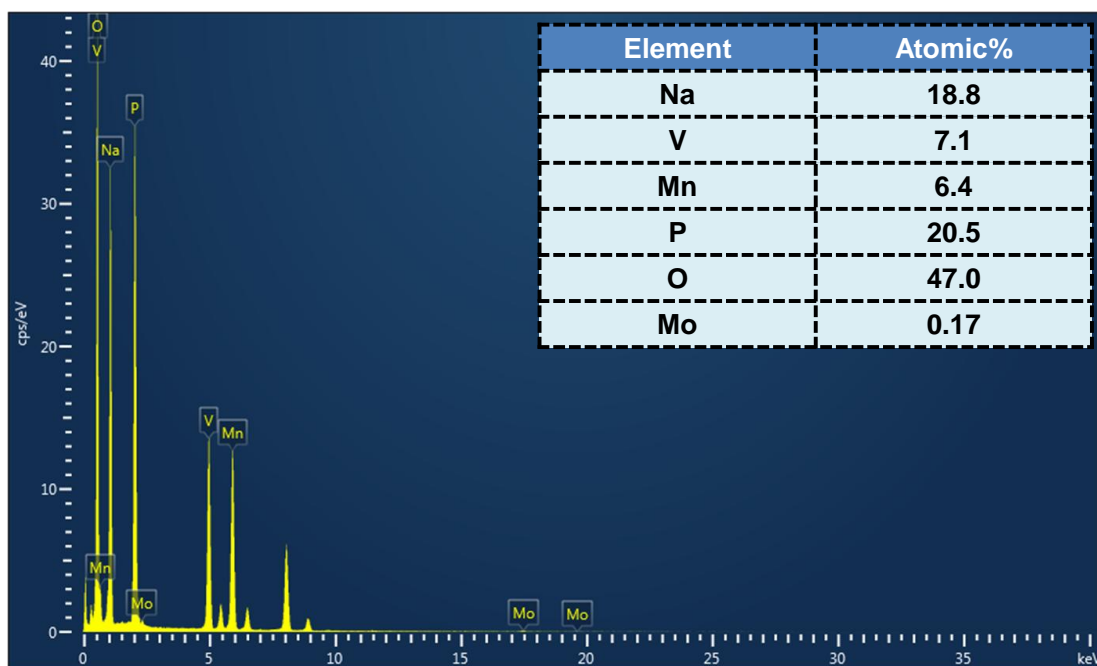

**Figure S6.** EDS results and derived elemental composition of the Mo0.03 cathode



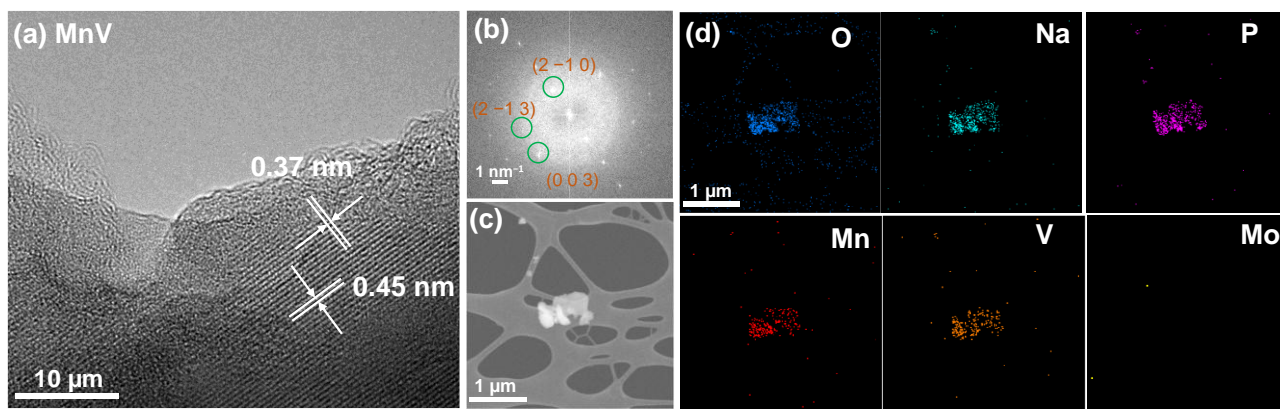

**Figure S7.** Typical (a) TEM image with corresponding (b) fast Fourier transform, (d) TEM image with corresponding (e) elemental mapping using EDS, of MnV.

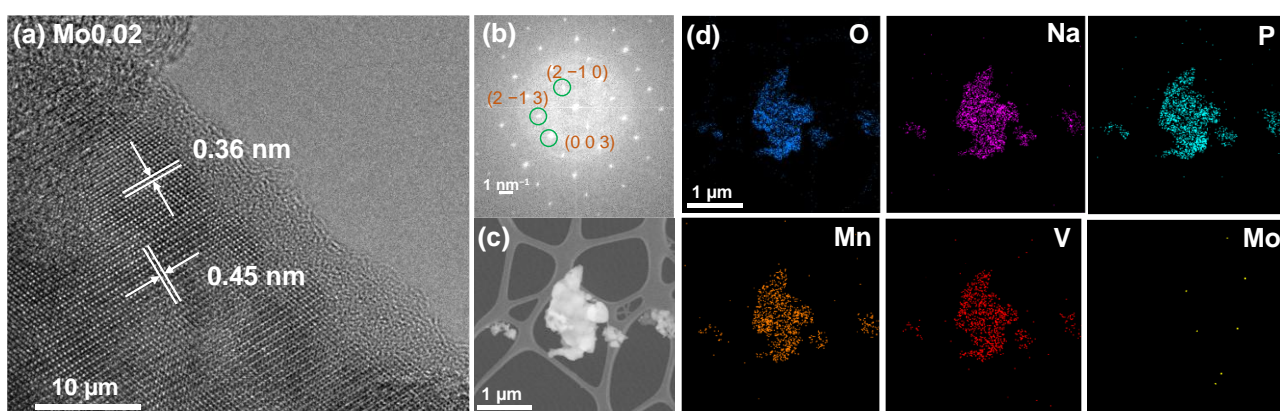

**Figure S8.** Typical (a) TEM image with corresponding (b) fast Fourier transform, (d) TEM image with corresponding (e) elemental mapping using EDS, of Mo0.02.

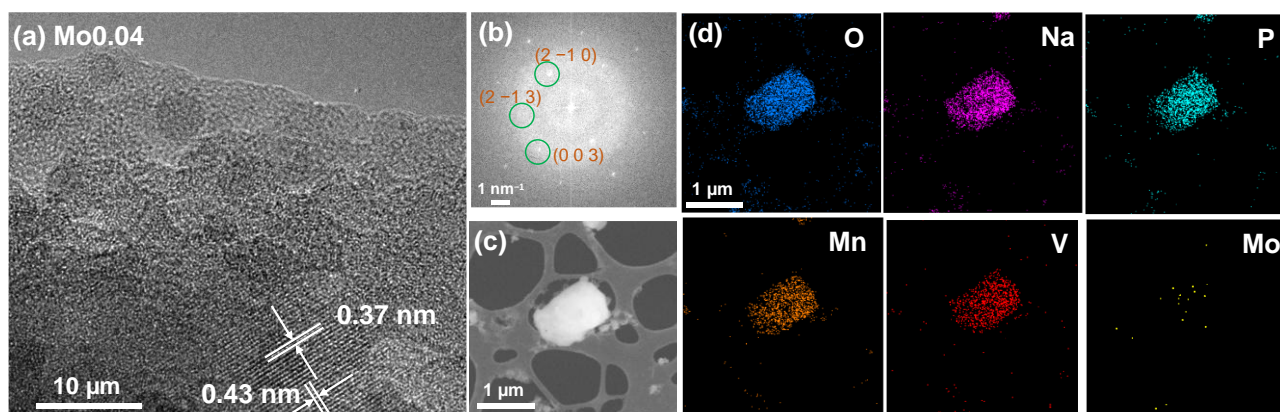

**Figure S9.** Typical (a) TEM image with corresponding (b) fast Fourier transform, (d) TEM image with corresponding (e) elemental mapping using EDS, of Mo0.04.



**Table S8.** ICP-MS determined elemental composition of MnV, Mo0.02, Mo0.03, and Mo0.04 cathodes

| Samples | Na     | V      | Mn     | P      | Mo     |
|---------|--------|--------|--------|--------|--------|
| MnV     | 4.1742 | 1.2198 | 1.0656 | 3.5404 | 0      |
| Mo0.02  | 4.2519 | 1.1620 | 1.0183 | 3.5489 | 0.019  |
| Mo0.03  | 4.1917 | 1.1477 | 1.0790 | 3.5504 | 0.0313 |
| Mo0.04  | 4.1819 | 1.1589 | 1.0591 | 3.5543 | 0.0458 |

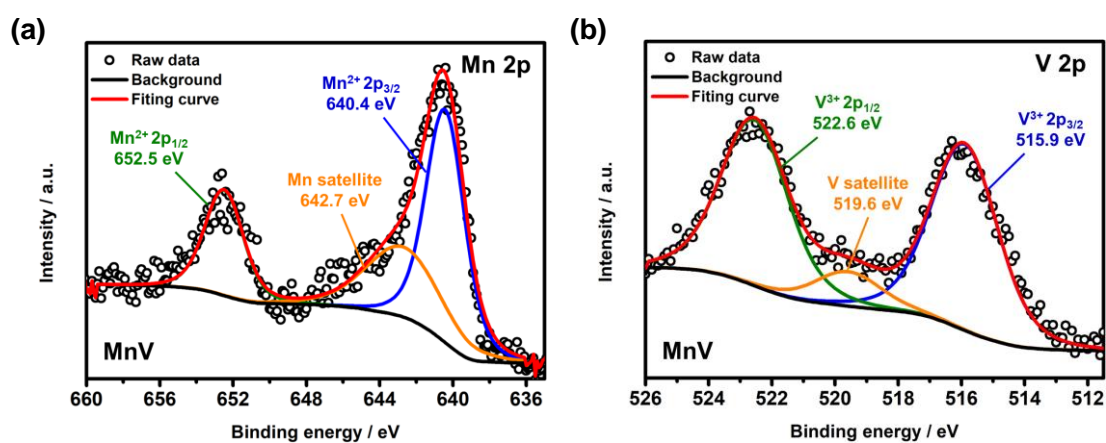**Figure S10.** (a) Mn and (b) V 2p XPS data of MnV with fitting.**Table S9.** Calculated and experimental lattice constants of Na<sub>4</sub>MnV(PO<sub>4</sub>)<sub>3</sub>.

|                               | a (Å)  | b (Å)  | c (Å)   | Volume (Å <sup>3</sup> ) |
|-------------------------------|--------|--------|---------|--------------------------|
| This work (cal.)              | 8.9471 | 8.9471 | 21.4567 | 1487.6                   |
| Gao, <i>et al.</i> (2020) [1] | 8.9398 | 8.9398 | 21.5317 | 1490.26                  |
| This work (exp.)              | 8.9540 | 8.9540 | 21.4850 | 1491.7                   |

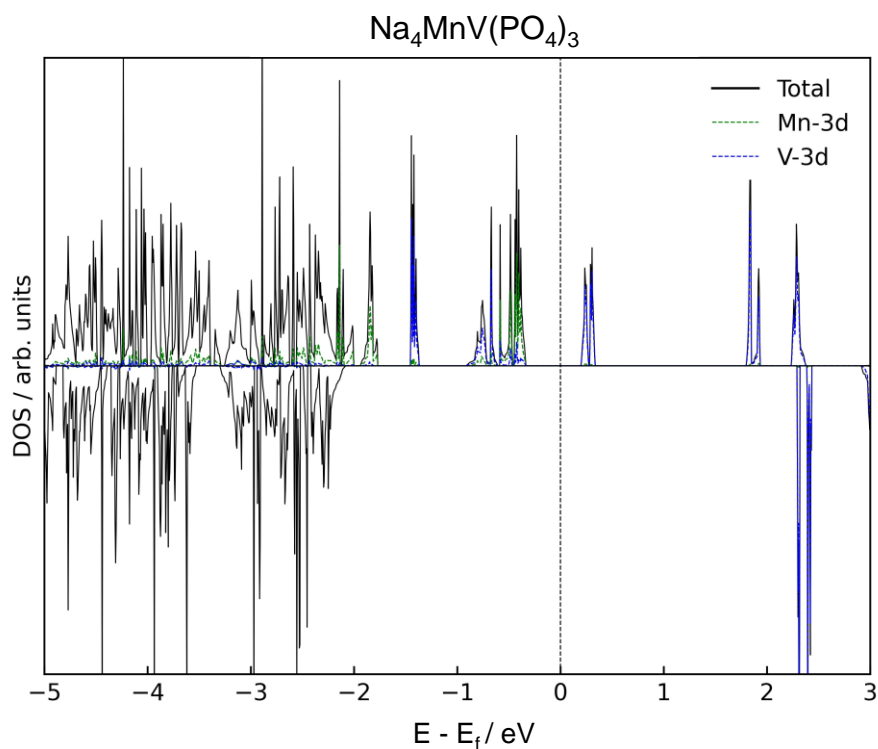

**Figure S11.** The calculated total and partial DOS of  $\text{Na}_4\text{MnV}(\text{PO}_4)_3$ . The Fermi level is set to zero as displayed by the dashed line.

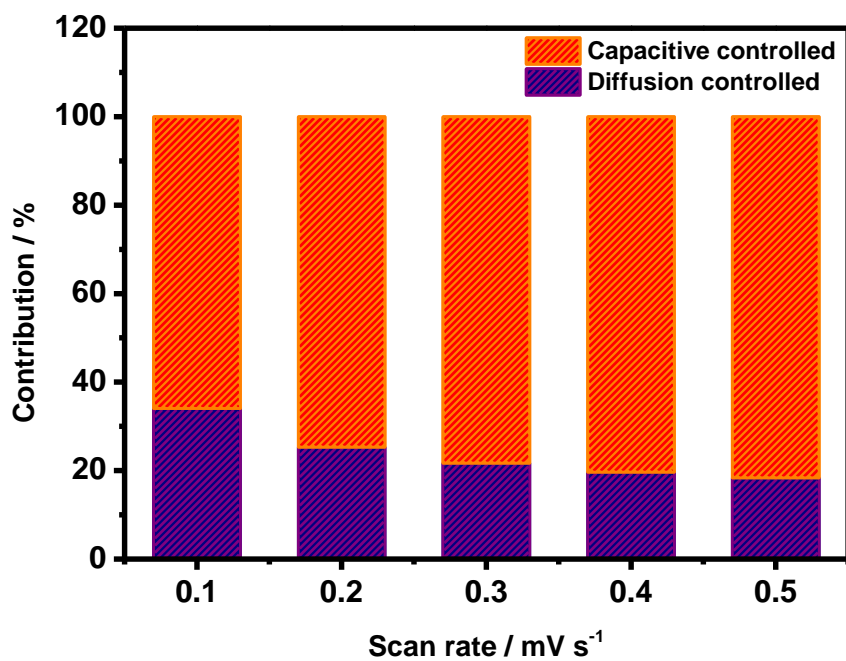

**Figure S12.** The capacitive (orange) and diffusion (purple) contribution to capacity at different scan rates from 0.1 to 0.5  $\text{mV s}^{-1}$  of  $\text{Mo}_0.03$ .

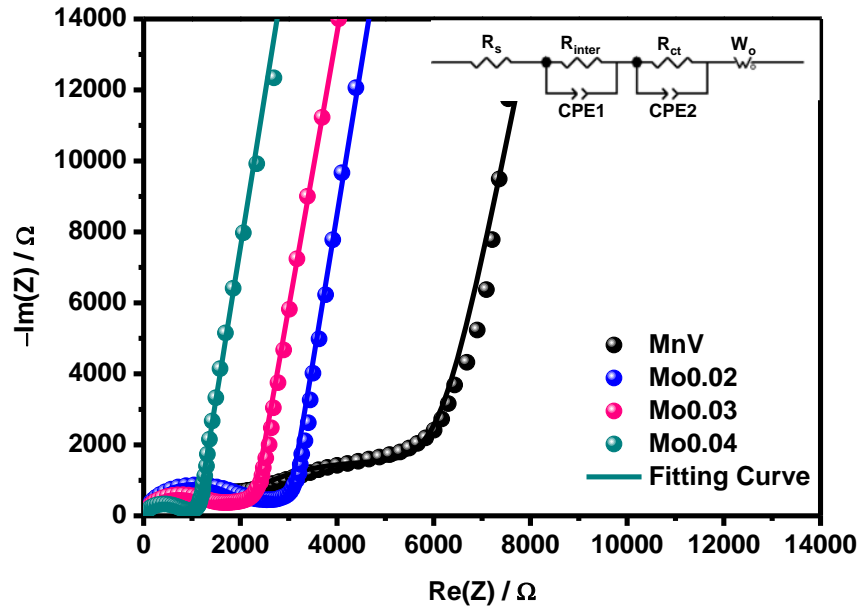

**Figure S13.** Electrochemical Impedance Spectroscopy (EIS) of MnV, Mo0.02, Mo0.03, and Mo0.04.

**Table S10.** Comparison of battery performance with other similar works in the literature.

| Cathode                                                                                     | Specific capacity / mAh g <sup>-1</sup> | Rate retention / mAh g <sup>-1</sup>    | Cycling stability       | Ref.     |
|---------------------------------------------------------------------------------------------|-----------------------------------------|-----------------------------------------|-------------------------|----------|
| Mo-doped Na <sub>4</sub> MnV(PO <sub>4</sub> ) <sub>3</sub> /C                              | 97.5 at 0.2C                            | 85.4 at 1C<br>69.2 at 5C<br>46.4 at 20C | 78.8% at 1C, 300 cycles | Our work |
| Na <sub>3.75</sub> VMn <sub>0.75</sub> Mg <sub>0.25</sub> (PO <sub>4</sub> ) <sub>3</sub>   | 79 at 0.1C                              | 80 at 5C                                | 70% at 1C, 100 cycles   | [2]      |
| Na <sub>3.75</sub> VMn <sub>0.75</sub> Al <sub>0.25</sub> (PO <sub>4</sub> ) <sub>3</sub>   | 93 at 0.1C                              | 82 at 5C                                | 96% at 1C, 100 cycles   | [2]      |
| Na <sub>3.9</sub> Mn <sub>0.95</sub> Zr <sub>0.05</sub> V(PO <sub>4</sub> ) <sub>3</sub> /C | 108.8 at 0.2C                           | 97 at 10C<br>88 at 20C                  | 81.2% at 1C, 500 cycles | [3]      |
| Na <sub>4</sub> VMn <sub>0.9</sub> Cu <sub>0.1</sub> (PO <sub>4</sub> ) <sub>3</sub> /C     | 117 at 0.25C                            | 68 at 40C                               | 86% at 30C, 3000 cycles | [4]      |

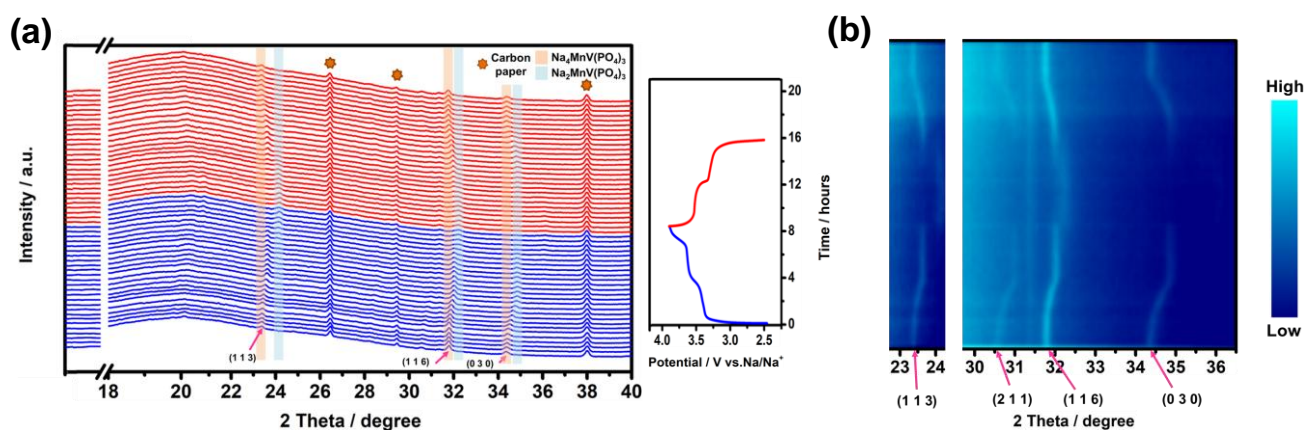

**Figure S14.** *In operando* XRD data of the MnV electrode shown as (a) 1 dimensional diffraction data offset in y for clarity and (b) as a contour map with intensity in colour as per the legend shown right.

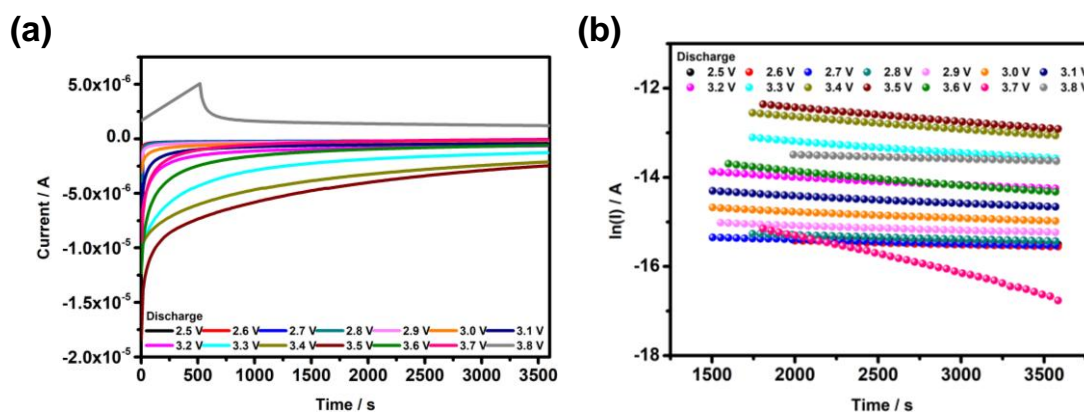

**Figure S15.** (a) First cycle discharge I-t and (b) ln(I)-t plots of the MnV electrode.

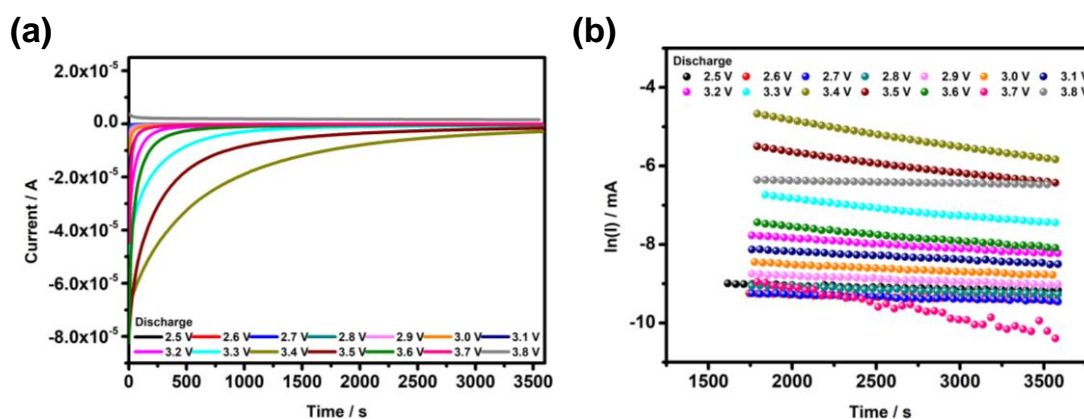

**Figure S16.** (a) First cycle discharge I-t and (b) ln(I)-t plots of the Mo0.03 electrode.

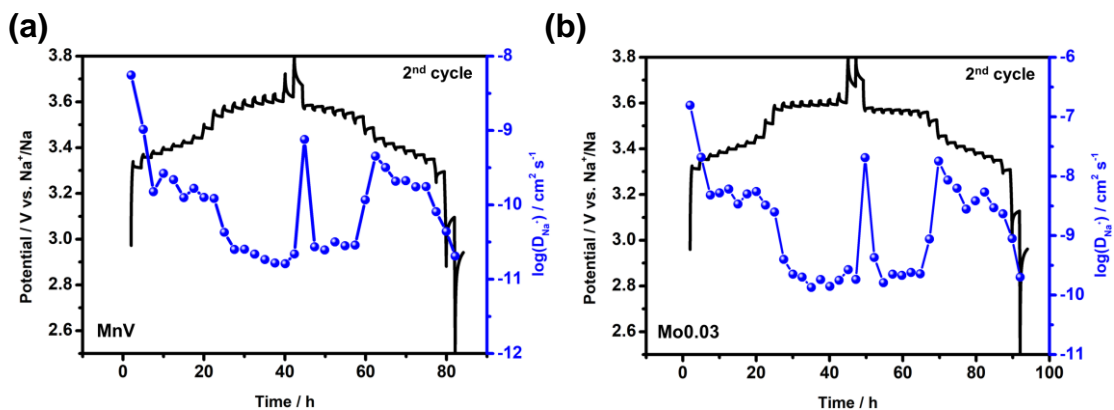

**Figure S17.** Second cycle GITT charge/discharge and calculated  $\log(D_{Na^+})$  plots for (a) MnV; (b) Mo0.03. Lines through the points are a guide to the eye.

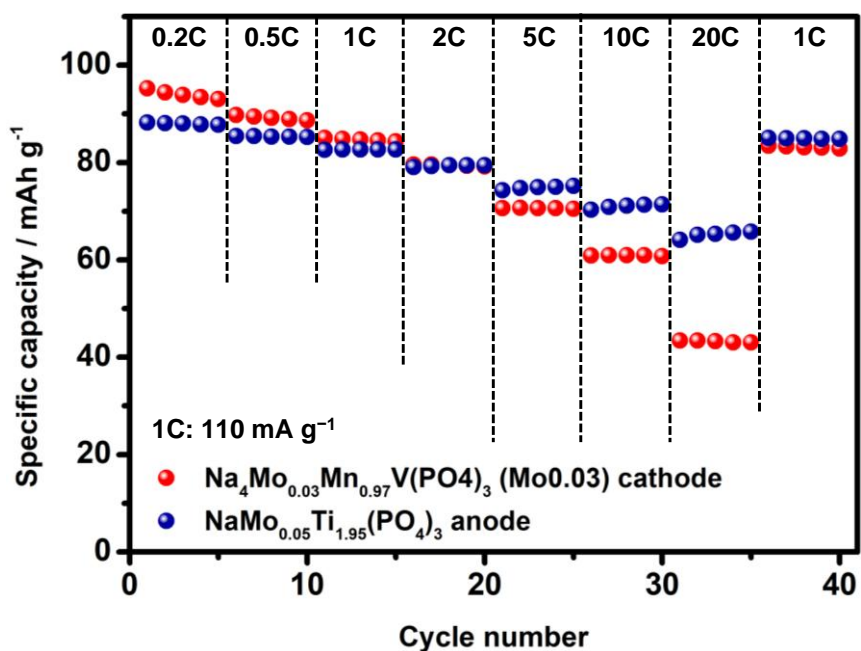

**Figure S18.** Rate performance of the  $\text{NaMo}_{0.05}\text{Ti}_{1.95}(\text{PO}_4)_3$  anode and Mo0.03 cathode at several current densities.

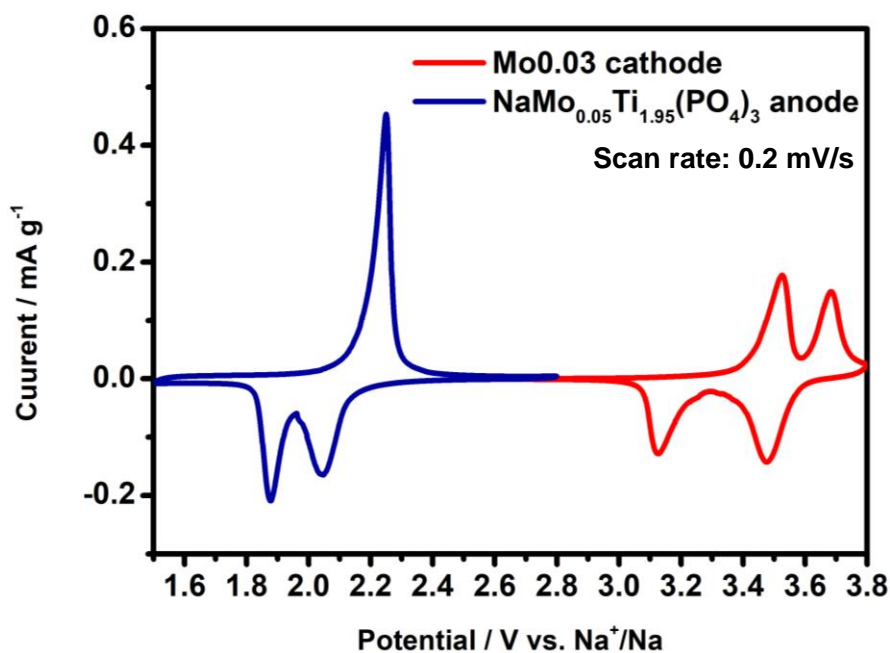

**Figure S19.** CV data of the NaMo<sub>0.05</sub>Ti<sub>1.95</sub>(PO<sub>4</sub>)<sub>3</sub> anode and Mo<sub>0.03</sub> cathode at a scan rate of 0.2 mV/s

## References

- [1] X. Gao, R. Lian, L. He, Q. Fu, S. Indris, B. Schwarz, X. Wang, G. Chen, H. Ehrenberg, Y. Wei, *Journal of Materials Chemistry A*, 8 (2020) 17477-17486.
- [2] S. Ghosh, N. Barman, P. Senguttuvan, *Small*, 16 (2020) 2003973.
- [3] Z. Wang, G. Cui, Q. Zheng, X. Ren, Q. Yang, S. Yuan, X. Bao, C. Shu, Y. Zhang, L. Li, *Small*, (2023) 2206987.
- [4] V. Soundharrajan, M.H. Alfaruqi, S. Lee, B. Sambandam, S. Kim, S. Kim, V. Mathew, D.T. Pham, J.-Y. Hwang, Y.-K. Sun, *Journal of Materials Chemistry A*, 8 (2020) 12055-12068.
